# Supplementary material for: In Vitro Characterization of Reversine-Treated Gingival Fibroblasts and Their Safety Evaluation after In Vivo Transplantation
Source: MDPI journal article supplement (doi:10.3390/pharmaceutics16020207), 2024-01-31
Supplement: s1 [file s1]

**Table S1.** Reversine screening conditions

| Group                     | Reversine Concentration | Cell culture medium renewal (each 24h) | Number of reversine administrations |
|---------------------------|-------------------------|----------------------------------------|-------------------------------------|
| DMSO                      | 0 $\mu$ M               | No                                     | 0                                   |
| 1 $\mu$ M 1 $\times$ WO   | 1 $\mu$ M               | No                                     | 1                                   |
| 1 $\mu$ M 4 $\times$ W    | 1 $\mu$ M               | Yes                                    | 4                                   |
| 1 $\mu$ M 4 $\times$ WO   | 1 $\mu$ M               | No                                     | 4                                   |
| 2.5 $\mu$ M 1 $\times$ WO | 2.5 $\mu$ M             | No                                     | 1                                   |
| 2.5 $\mu$ M 4 $\times$ W  | 2.5 $\mu$ M             | Yes                                    | 4                                   |
| 2.5 $\mu$ M 4 $\times$ WO | 2.5 $\mu$ M             | No                                     | 4                                   |
| 5 $\mu$ M 1 $\times$ WO   | 5 $\mu$ M               | No                                     | 1                                   |
| 5 $\mu$ M 4 $\times$ W    | 5 $\mu$ M               | Yes                                    | 4                                   |
| 5 $\mu$ M 4 $\times$ WO   | 5 $\mu$ M               | No                                     | 4                                   |

1 $\times$ : one administration. 4 $\times$ : four administrations. W: with medium change; WO: without medium change

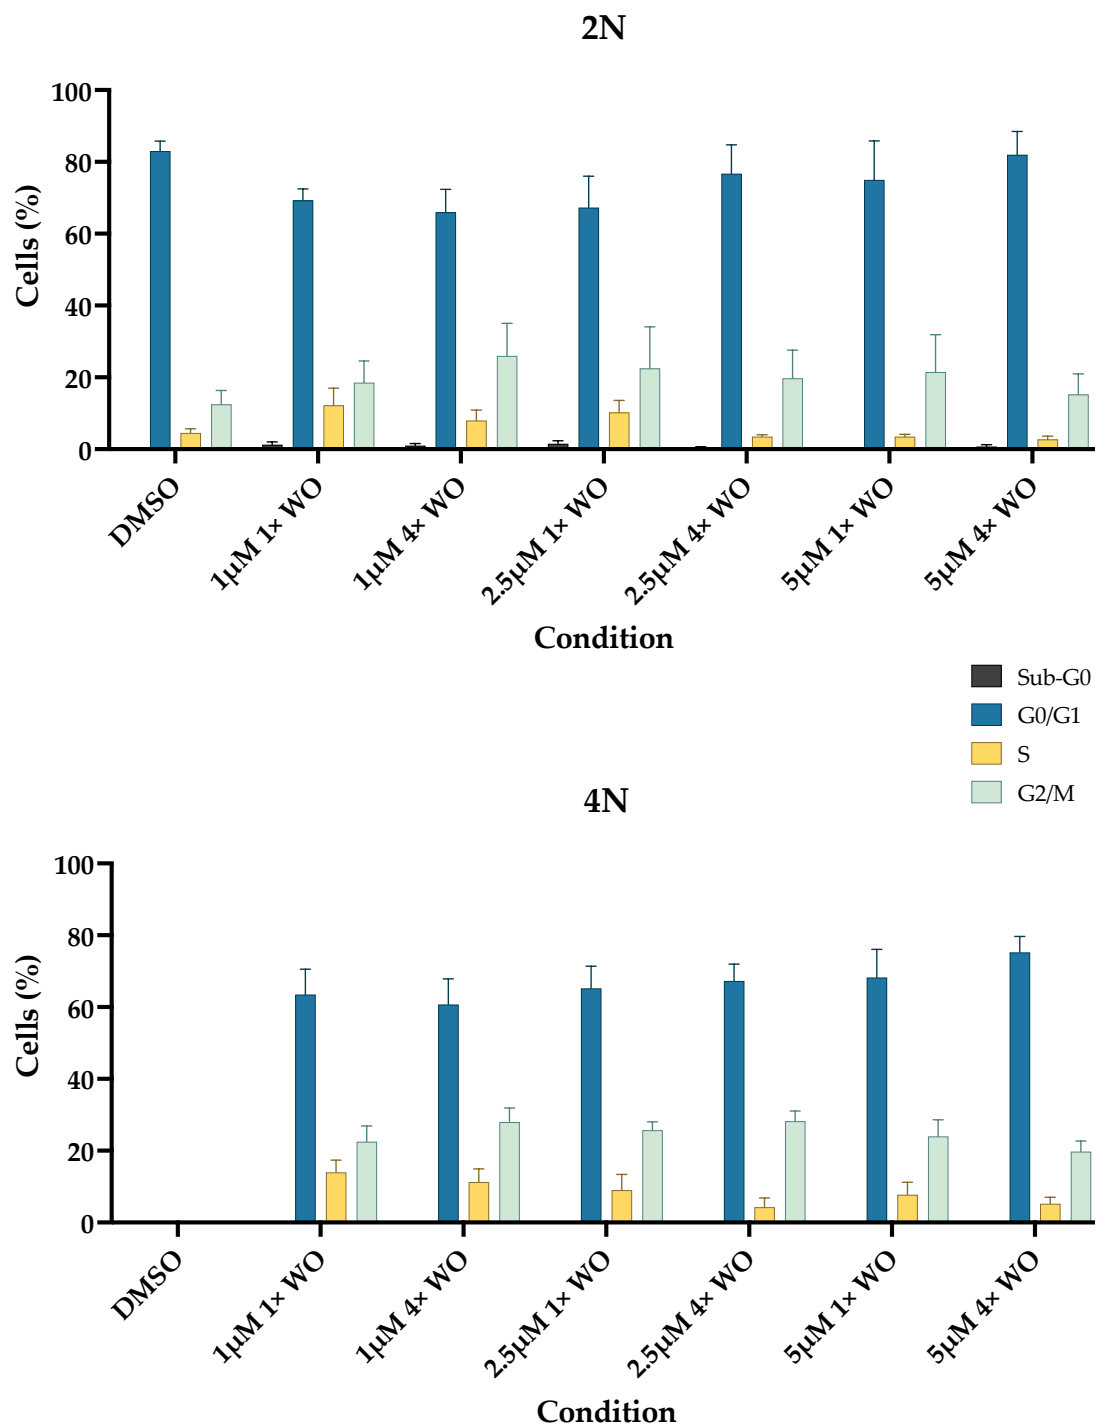

**Figure S1:** Cell cycle analysis. Percentage of cells in Sub-G0, G0/G1, S, and G2/M phases for the 2N and 4N populations. Results were obtained by flow cytometry and are presented as mean  $\pm$  SE of at least three independent experiments. 1 $\times$ : one administration. 4 $\times$ : four administrations. WO: without medium change.

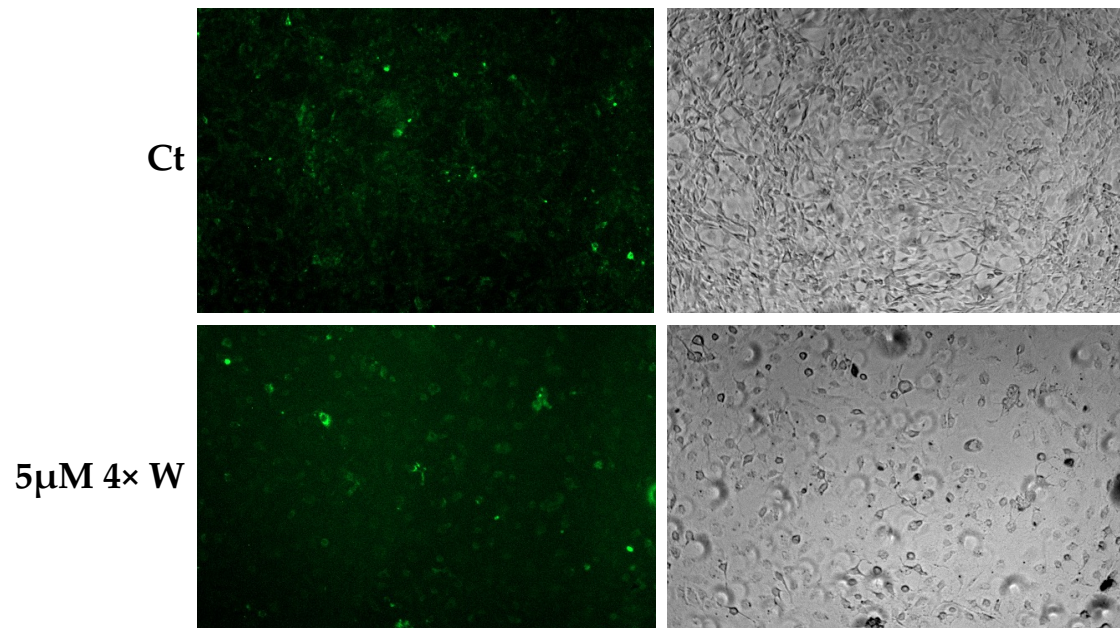

**Figure S2.** Channel images of the enzymatic activity labeling of alkaline phosphatase. The fluorescence (left column) and optical (right column) are shown for the control group and the dedifferentiated cells (5 $\mu$ M 4 $\times$  W). Ct: control. 4 $\times$ : four administrations. W: with medium change.

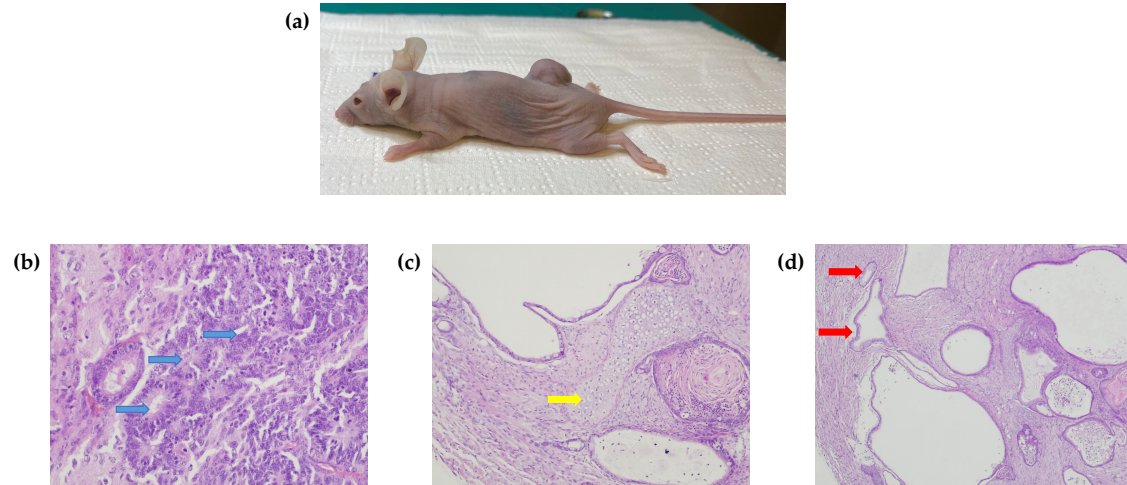

**Figure S3.** Teratoma formation **(a)** Teratoma formation occurred after subcutaneous injection of mouse embryonic stem cells (mESCs). Representative images of **(b)** mature and immature nervous tissue (ectoderm) – blue arrows, 200× magnification; **(c)** cartilage (mesoderm) – yellow arrows, 100× magnification and **(d)** glandular tissue (endoderm) – red arrows, 40× magnification are shown. Hematoxylin and eosin staining.
